# Supplementary material
Source: Research Square preprint supplement (doi:10.21203/rs.3.rs-9100795/v1)
Supplement: Supplementary file 2 [file 60a6f8e8eca8b7f167f7f42c.docx]

| Criteria | 4 (Excellent) | 3 (Good) | 2 (Satisfactory) | 1 (Needs Improvement) | Total |
| --- | --- | --- | --- | --- | --- |
| Content and Organization | The content is clear, logical, and easy to follow throughout the presentation. | Mostly well-organized with minor areas needing clarity. | Covers major aspects but lacks some clarity or organization. | Some aspects are missing or poorly organized, making it hard to follow. |  |
| Research Understanding and Relevance | Demonstrates deep understanding. | Strong understanding, demonstrating minor gaps in relevance. | Adequate understanding, though significance may not be clearly explained. | Limited understanding or lacks depth in explaining relevance. |  |
| Methodology and Data Analysis | Clear explanation and justification of methodology and data analysis. | Mostly clear, with minor areas needing stronger justification. | Basic methodology is explained but lacks depth or clarity in data analysis. | Methodology is unclear or lacks justification, and data analysis is poorly explained. |  |
| Presentation Skills | Strong and professional communication. | Communicates well with minor lapses in engagement or confidence. | Adequate presentation skills but lacks confidence. | Struggles with clear communication and lacks confidence. |  |
| Visual Aids (Slides/Poster) | Visuals are clear, relevant, well-designed, and enhance understanding. | Mostly clear and helpful visuals, with minor design issues. | Visuals are adequate but could be improved for better clarity and enhance understanding. | Poorly designed visuals that are unclear or distracting. |  |
| Question and Answer Session | Confident and accurate responses, showing strong knowledge. | Responds well to most questions, with minor lapses in confidence or detail. | Answers questions but may lack confidence or depth. | Struggles to answer questions clearly and demonstrates limited understanding. |  |
| Maximum Total Points: 24 | | | | Total Points: |  |

**Rubric for Medical Student Research Presentation Session**

Presenter Name: ____________________________________________

Date: __________________________

Comments from Reviewer: (Please provide specific feedback to support your scoring.)
